# Supplementary material for: Antioxidant silicone oils from natural antioxidants
Source: Royal Society of Chemistry journal article supplement (doi:10.1039/d2gc03112d), 2022-01-01
Supplement: d2gc03112d1.pdf [file d2gc03112d1.pdf]

## Antioxidant Silicone Oils from Natural Antioxidants

Michael A. Brook,<sup>\*a</sup> Akop Yepremyan,<sup>a</sup> Guanhua Lu,<sup>a</sup> Miguel Melendez-Zamudio,<sup>a</sup> Daniel J. Hrabowyj,<sup>a</sup> and Cody B. Gale<sup>a</sup>

### Supporting information

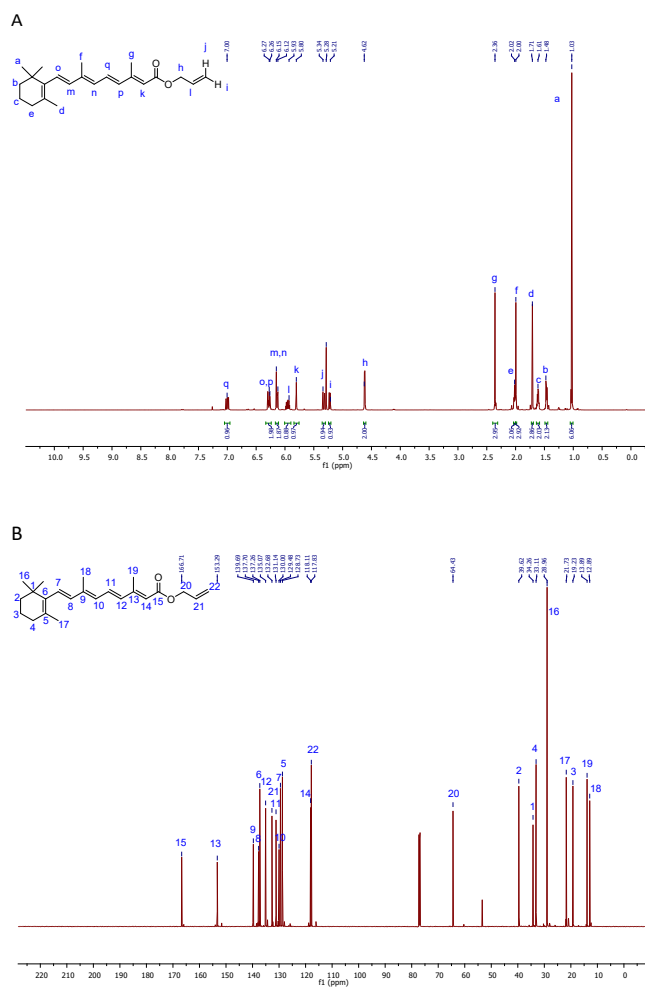

Figure S1. A) <sup>1</sup>H NMR and B) <sup>13</sup>C NMR of allyl retinoate.

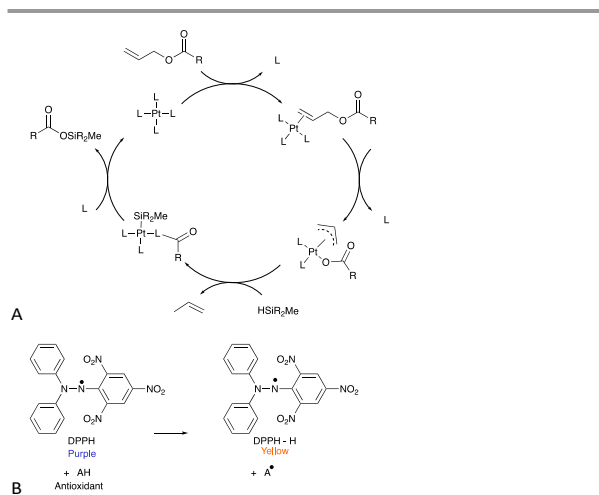

Figure S2. A) Competitive displacement of the  $\pi$ -allyl complex leading to silyl esters. B) DPPH reactivity.

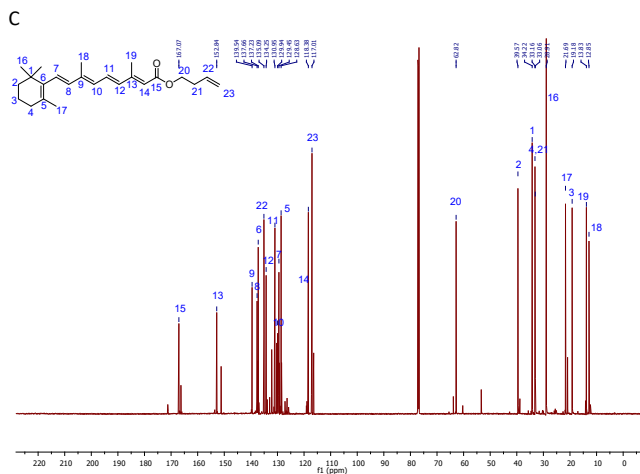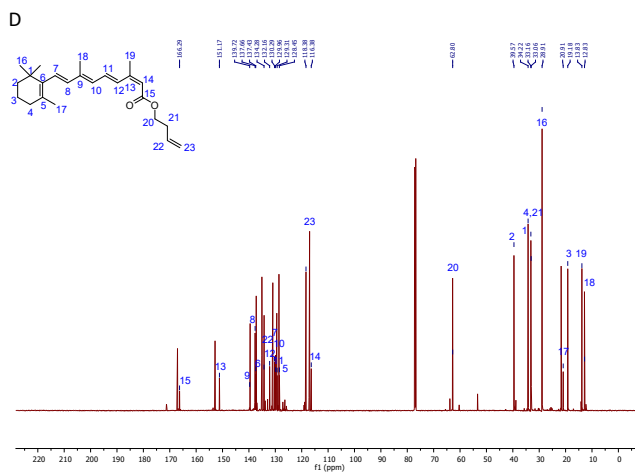

Figure S3.  $^1\text{H}$  NMR of A) 2-E and B) 2-Z homoallyl retinoate.  $^{13}\text{C}$  NMR of the C) 2-E and D) 2-Z homoallyl retinoate.

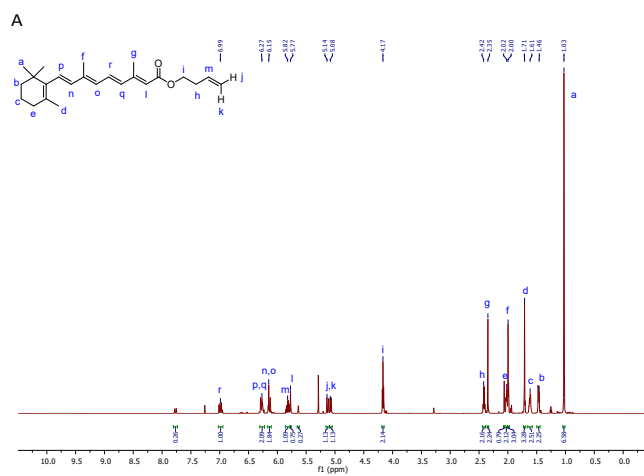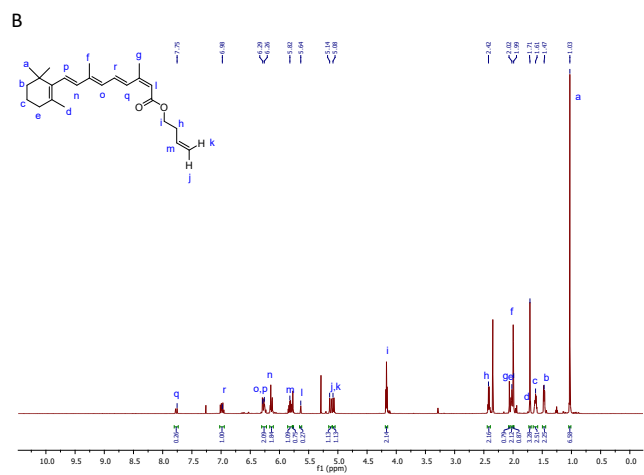

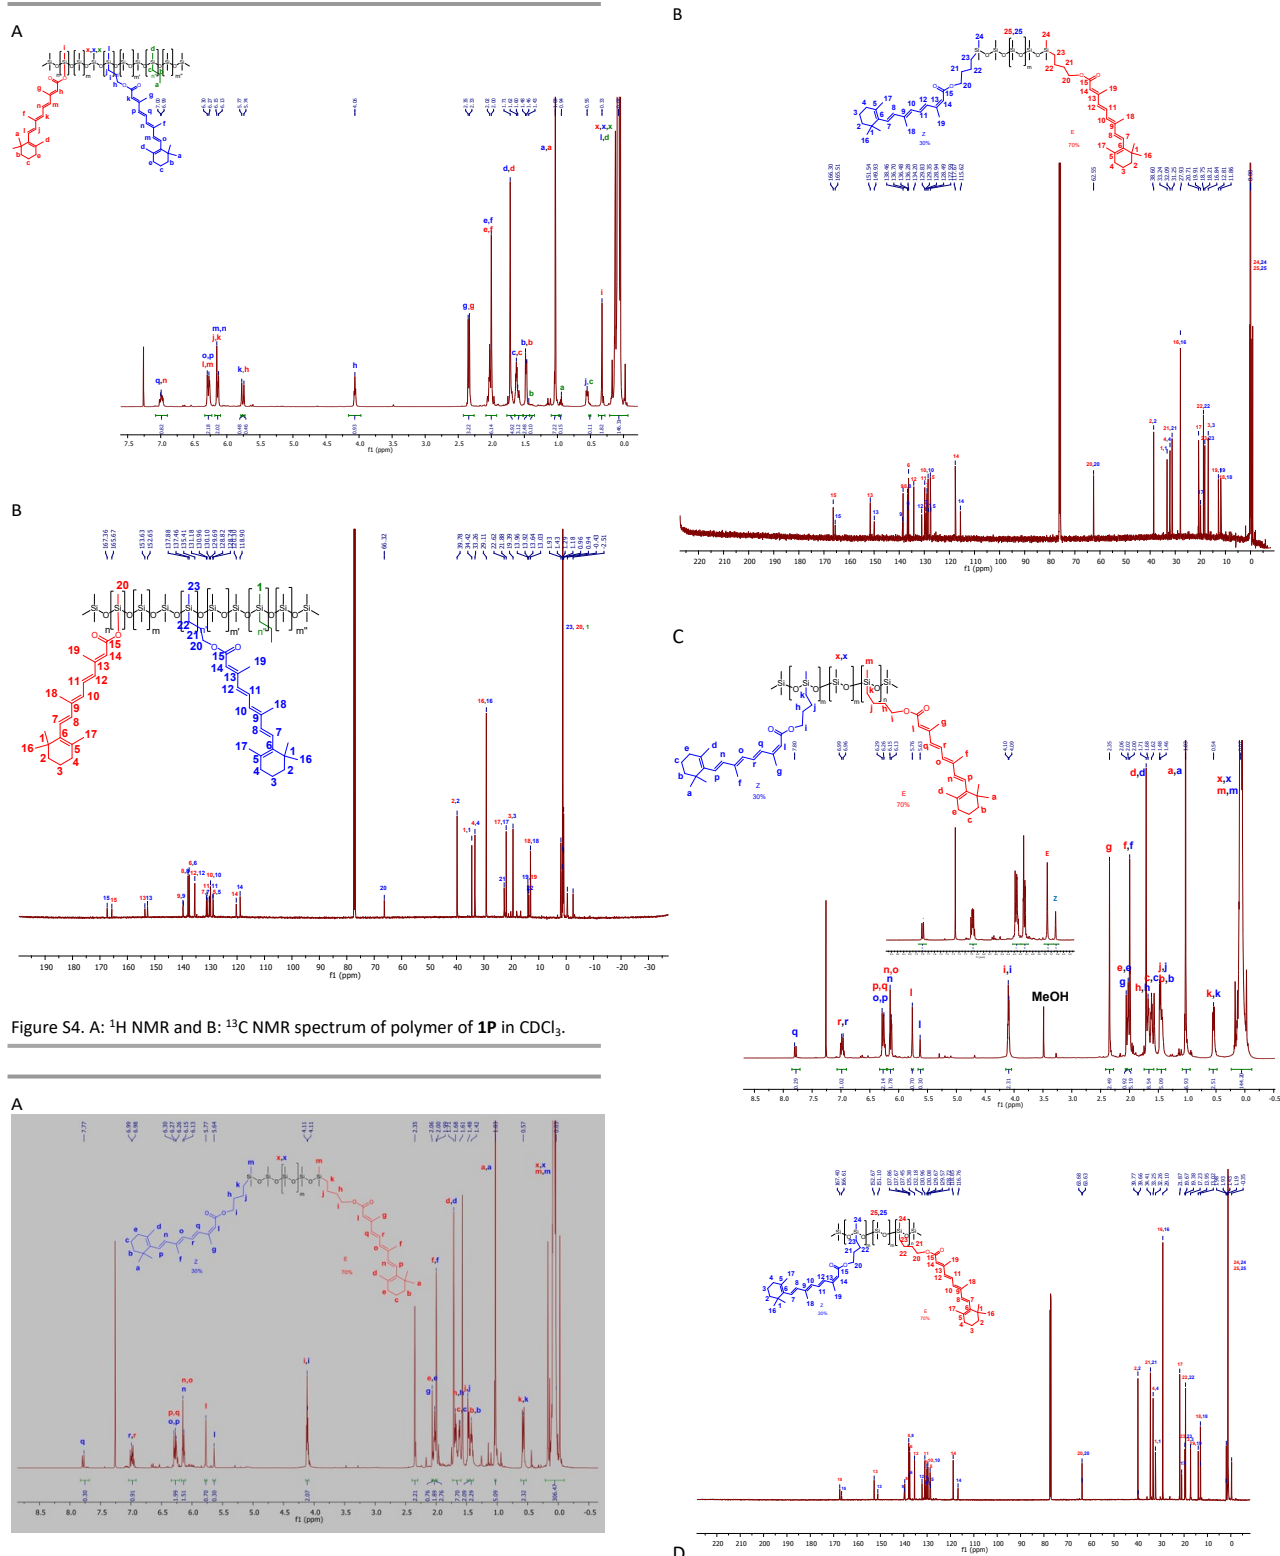

Figure S4. A:  $^1\text{H}$  NMR and B:  $^{13}\text{C}$  NMR spectrum of polymer of **1P** in  $\text{CDCl}_3$ .

Figure S5. A:  $^1\text{H}$  NMR and B:  $^{13}\text{C}$  NMR spectrum of polymer **3T** in  $\text{CDCl}_3$ . C:  $^1\text{H}$  NMR and D:  $^{13}\text{C}$  NMR spectrum of polymer **3P** in  $\text{CDCl}_3$ .

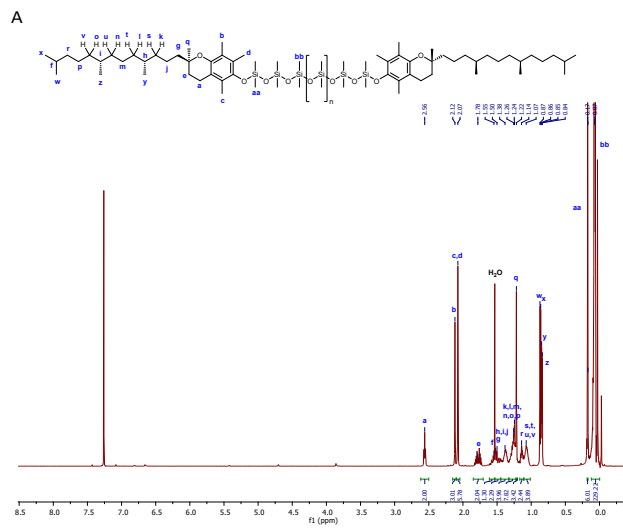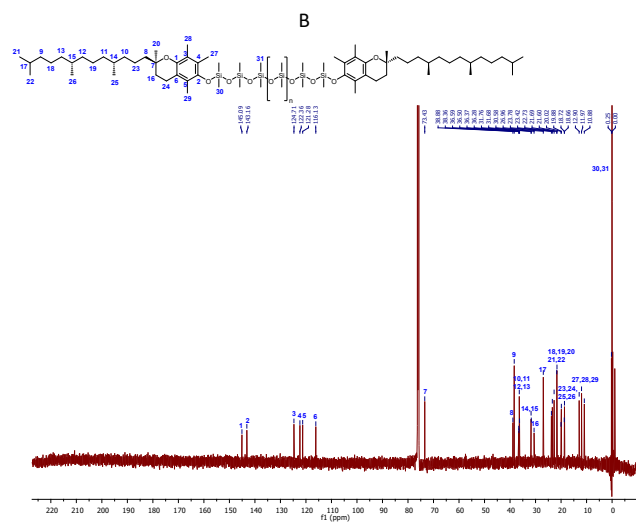

Figure S6. A) <sup>1</sup>H NMR and B) <sup>13</sup>C NMR of 4T.

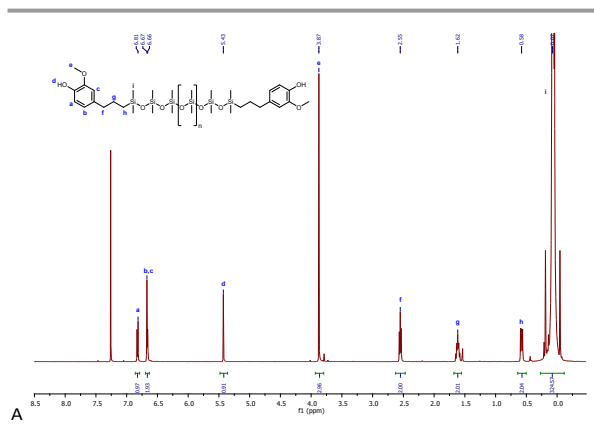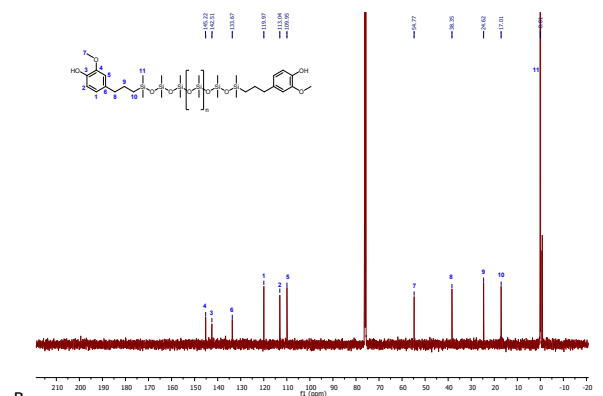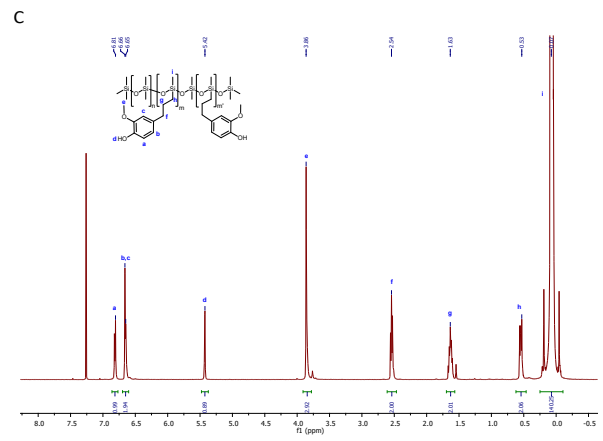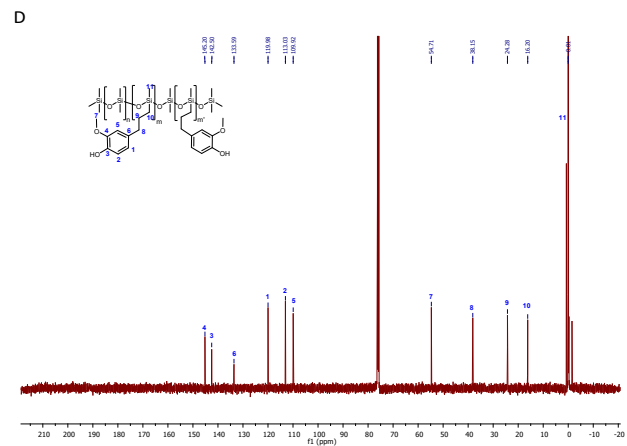

Figure S7. A) <sup>1</sup>H NMR and B) <sup>13</sup>C NMR of 5T. C) <sup>1</sup>H NMR and D) <sup>13</sup>C NMR of 5P-6.

Table S1. DPPH assay 80 mM stock solution preparation information.

|                     | Total Vol (mL) | Mass (mg) | Moles (mmol) | concentration (mM) |
|---------------------|----------------|-----------|--------------|--------------------|
| <b>P-4 control</b>  | 4              | 389       | 0.32         | 80                 |
| Retinoate Acid      | 5              | 120       | 0.40         | 80                 |
| Homoallyl Retinoate | 5              | 142       | 0.40         | 80                 |
| <b>3T</b>           | 3              | 719       | 0.24         | 80                 |
| <b>3P</b>           | 2              | 317       | 0.18         | 80                 |
| Tocopherol          | 4              | 138       | 0.32         | 80                 |
| Tocopherol Acetate  | 4              | 151       | 0.32         | 80                 |
| <b>4T</b>           | 4              | 858       | 0.32         | 80                 |
| Eugenol             | 4              | 53        | 0.32         | 80                 |
| <b>5P-6</b>         | 3              | 361       | 0.24         | 80                 |
| <b>5T</b>           | 2              | 224       | 0.08         | 40                 |

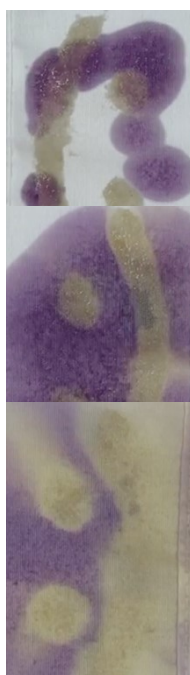

Figure S9. A cotton cloth on which yellow/brown drops of **5P-17** were spotted was soaked with 0.2 mM DPPH solution (the inverse of Figure 4A). A) Oil on cotton while DPPH (purple) is being dispensed; B) 15 s and C) 40 s after complete exposure

The data is provided in Figure 3 as log plots. See also a DPPH concentration dependent linear plot (Figure S8).

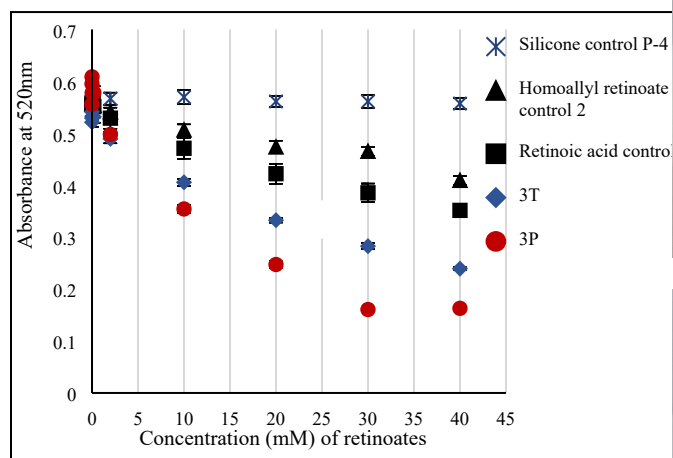

Figure S8. DPPH UV assay at 520 nm wavelength, comparison of anti-oxidation activity of different **3T** and **3P** to Vitamin A.

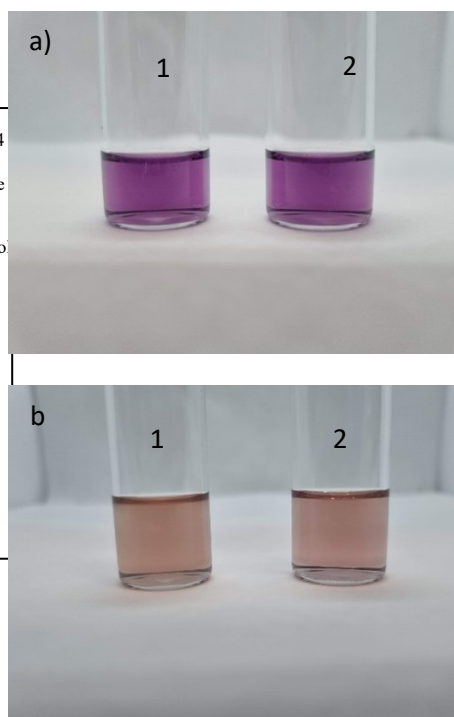

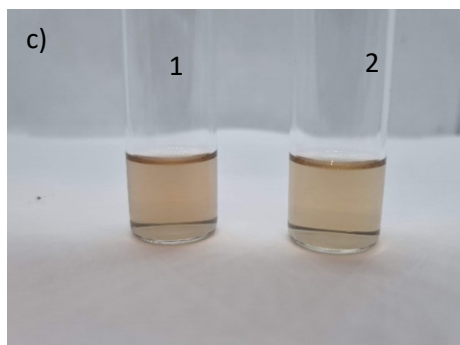

Figure S10. Antioxidant activity using DPPH at time 0, 3 min and 15 minutes of 1) **4P-17** and 2) **4P-26**

Table S2 Eugenol elastomer DPPH assay preparation information.

|              | Mass (mg) | Concentration in 1 mL IPA (mM) |
|--------------|-----------|--------------------------------|
| <b>5E-33</b> | 1         | 0.13                           |
|              | 10        | 1.30                           |
|              | 100       | 13.05                          |
| <b>5E-50</b> | 1         | 0.32                           |
|              | 10        | 3.16                           |
|              | 100       | 31.60                          |
| <b>5E-75</b> | 1         | 0.86                           |
|              | 10        | 8.59                           |
|              | 100       | 85.90                          |

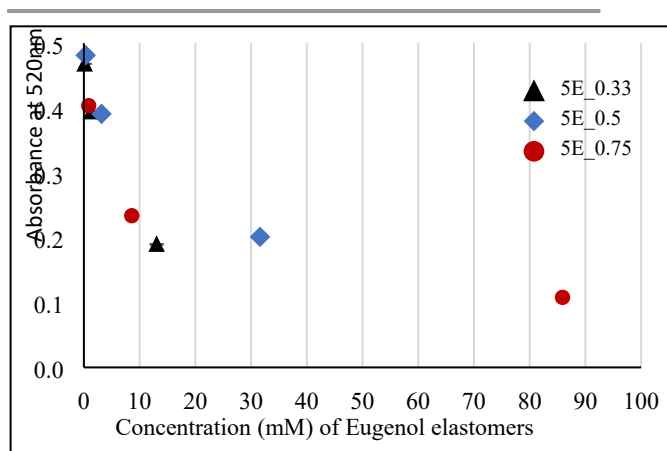

Figure S11. DPPH UV Analysis of **5E-33**, **-50**, **-75**, respectively, when mixed with 0.1 mM DPPH solution.

Table S3 Eugenol elastomer DPPH assay preparation information: No effect of exposure to H<sub>2</sub>O<sub>2</sub>.

|               | Amount (mg) | Time to Decolorization (s) |
|---------------|-------------|----------------------------|
| <b>5P-17</b>  | 100         | 81                         |
| <b>5P-17*</b> | 100         | 81                         |
| <b>5E-33</b>  | 100         | 5510                       |
| <b>5E-33*</b> | 100         | 5510                       |
| <b>5E-50</b>  | 100         | 5233                       |
| <b>5E-50*</b> | 100         | 5233                       |
| <b>5E-75</b>  | 100         | 2019                       |
| <b>5E-75*</b> | 100         | 2019                       |

\*Oil or elastomer treated with H<sub>2</sub>O<sub>2</sub>.
